# Supplementary material for: A straightforward, efficient, and environmentally friendly lithium storage tactic: solventless fabrication of N/S co-doped SiO x /C with carbon encapsulation
Source: Royal Society of Chemistry journal article supplement (doi:10.1039/d4ta06625a), 2024-12-09
Supplement: d4ta06625a1.pdf [file d4ta06625a1.pdf]

## Supporting information

# A Straightforward, Efficient, and Environment-Friendly Lithium Storage Tactic: Solventless fabrication of N/S Co-doped SiO<sub>x</sub>/C with Carbon Encapsulation

*Haohui Zhang<sup>1</sup>, Zhiyuan Wang<sup>1</sup>, Kaize Si, Xinxin Sun, Jianing Zong, Xiaomei Wang\*,  
and Xu Zhang\**

Hebei key Laboratory of Functional Polymers, School of Chemical Engineering and  
Technology, Hebei University of Technology, Tianjin 300130, P.R. China

\*Corresponding author: E-mail: xmwang@hebut.edu.cn and xuzhang@hebut.edu.cn

<sup>1</sup>These two authors equally contributed to this work.

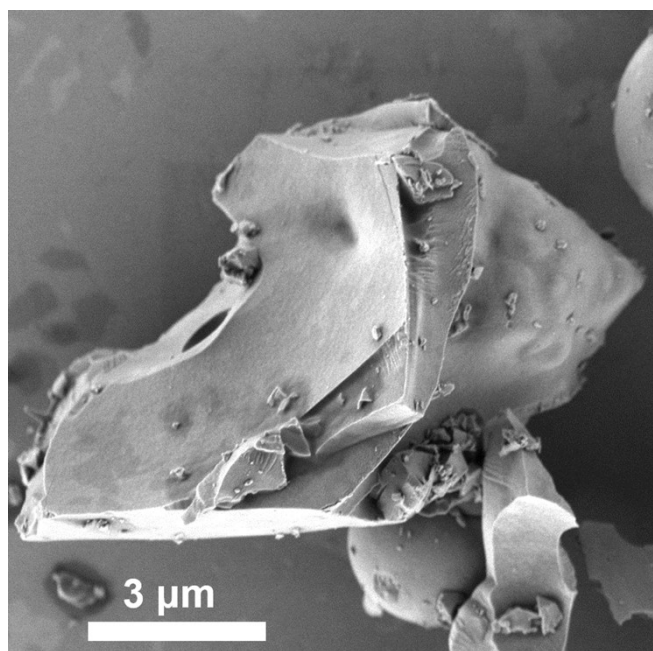

**Figure S1.** SEM image of N/S-Bulk-vinly-SiO<sub>2</sub>-2.

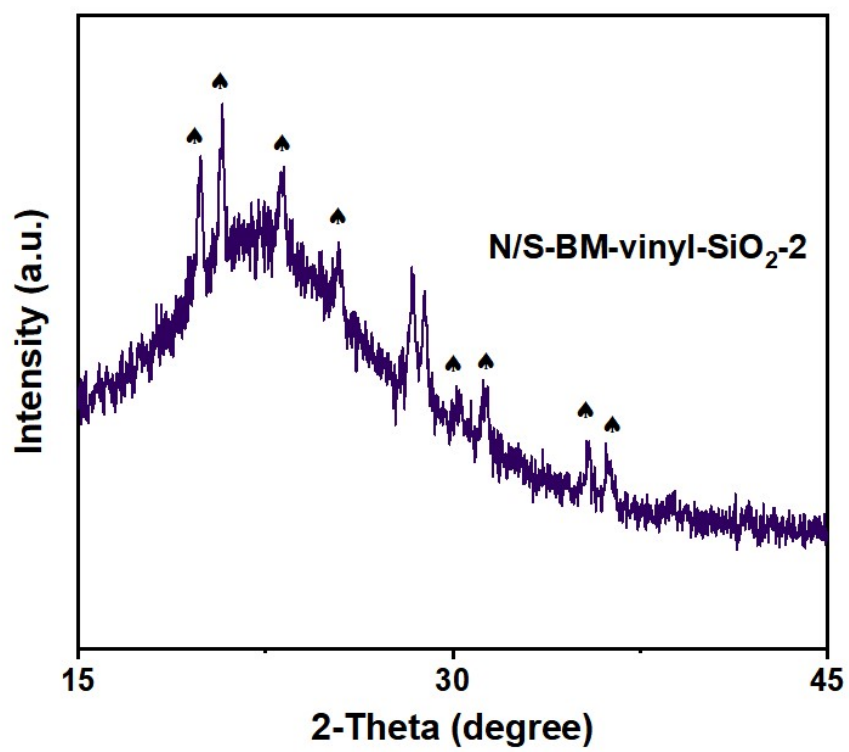

**Figure S2.** XRD pattern of N/S-BM-vinyl-SiO<sub>2</sub>-2.

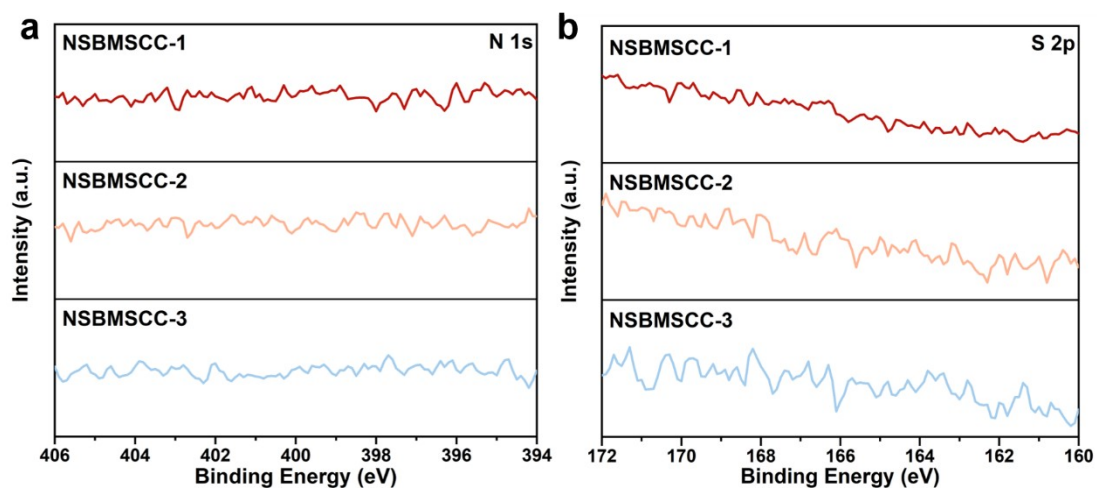

**Figure S3.** (a) N 1s spectra of NSBMSCC-1, NSBMSCC-2, and NSBMSCC-3. (b) S 2p spectra of NSBMSCC-1, NSBMSCC-2, and NSBMSCC-3.

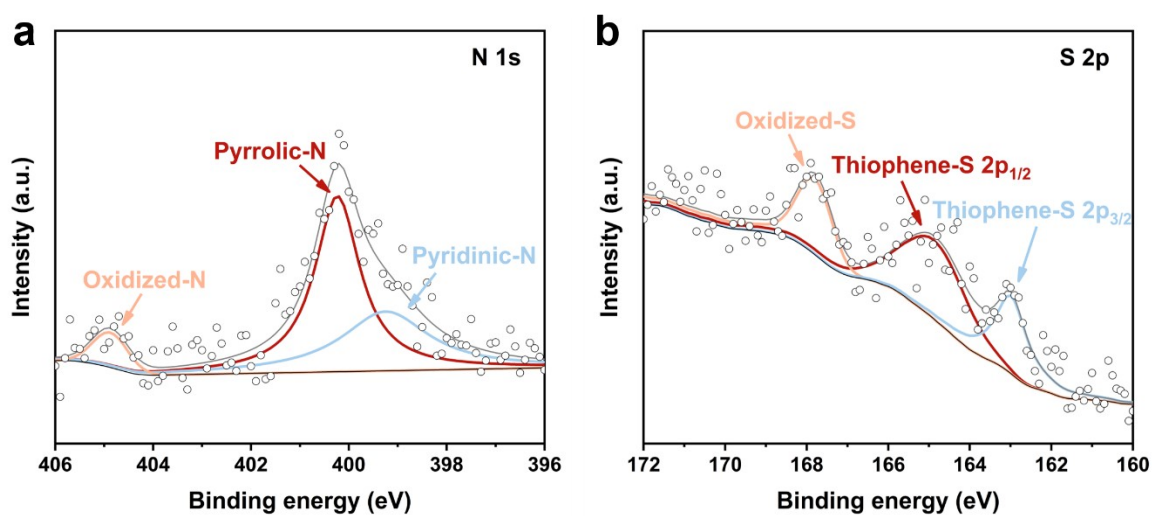

**Figure S4.** (a) N 1s spectra of N/S-BM-vinly-SiO<sub>2</sub>-2. (b) S 2p spectra of N/S-BM-vinly-SiO<sub>2</sub>-2.

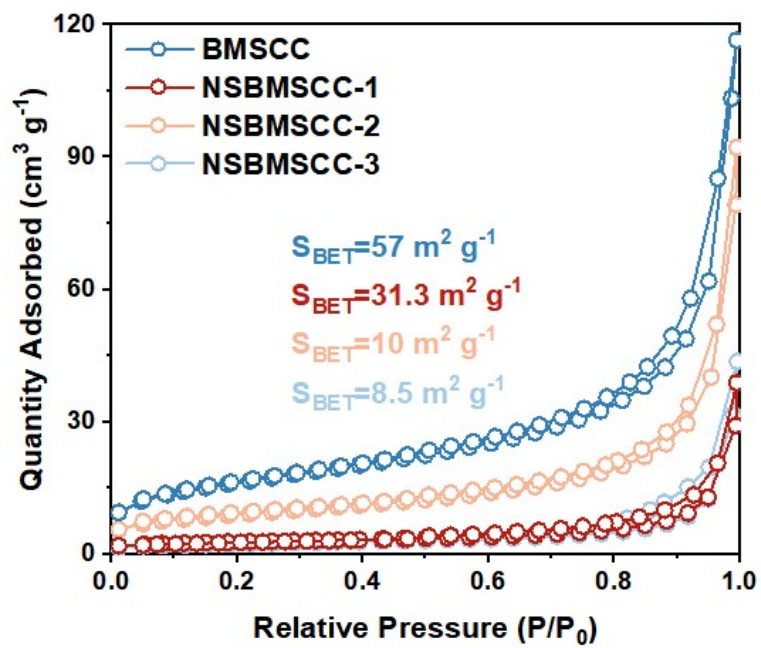

**Figure S5.** N<sub>2</sub> adsorption-desorption isotherms of BMSCC, NSBMSCC-1, NSBMSCC-2, and NSBMSCC-3.

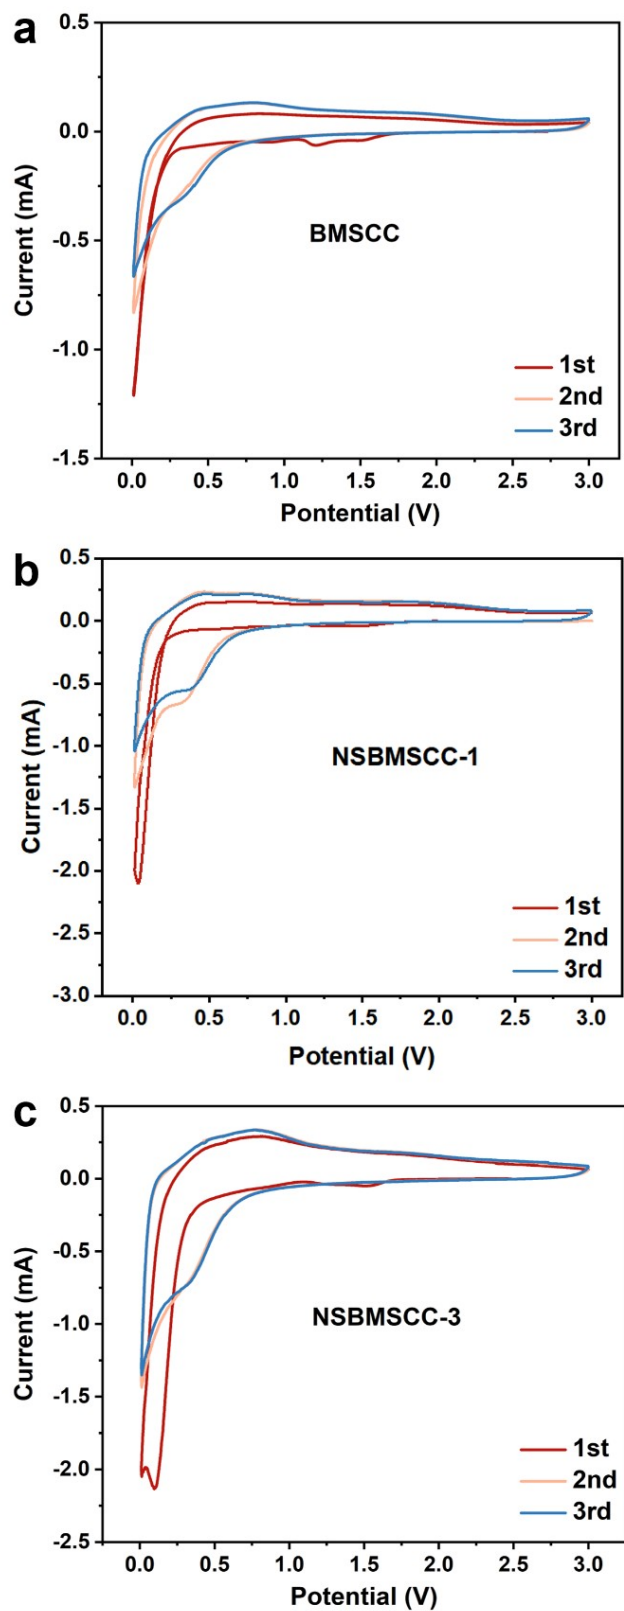

**Figure S6.** CV curves of (a) BMSCC, (b) NSBMSCC-1, and (c) NSBMSCC-3.

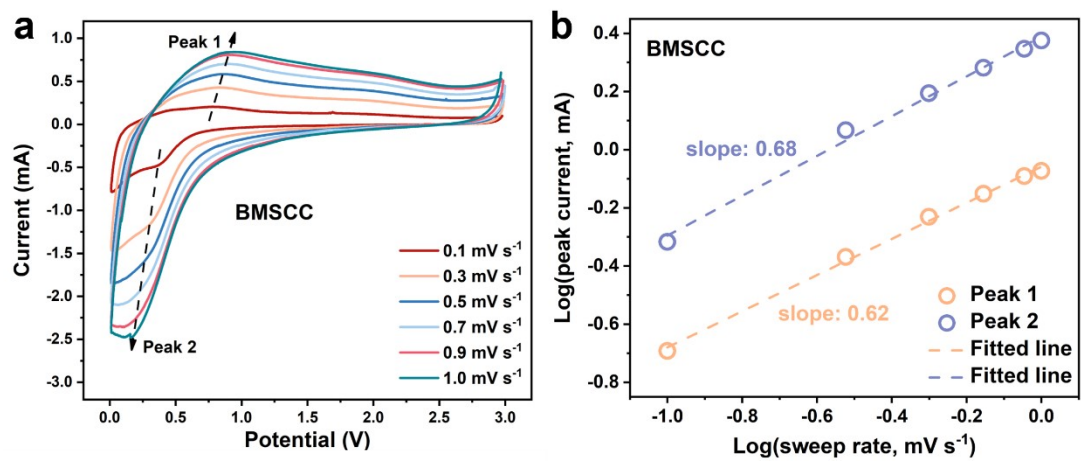

**Figure S7.** (a) CV curves and (b)  $\log i$  vs  $\log v$  plots at different scan rates of BMSCC.

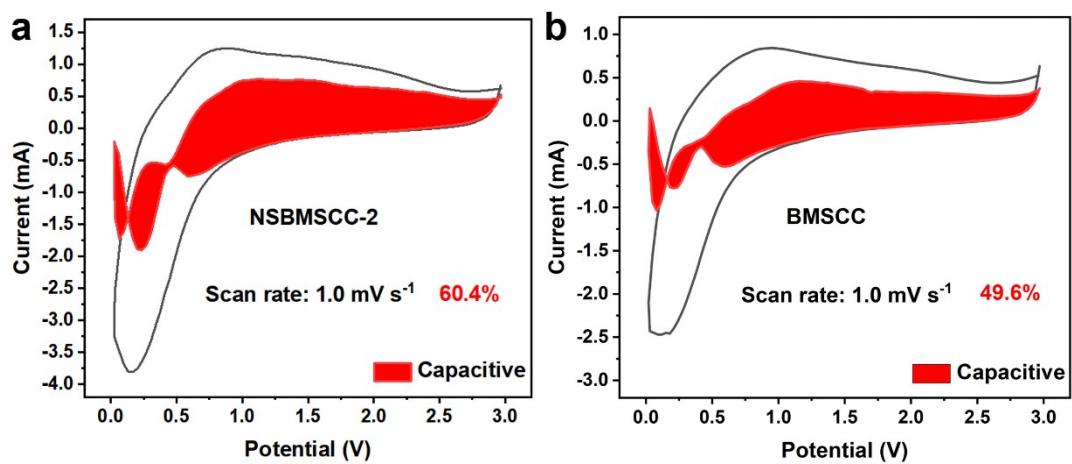

**Figure S8.** The capacitive contribution at  $1.0 \text{ mV s}^{-1}$  of (a) NSBMSCC-2 and (b) BMSCC.



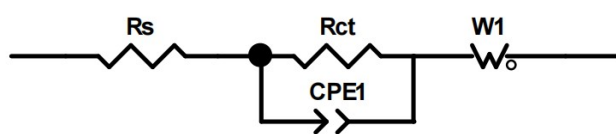

**Figure S9.** The equivalent circuit for data fitting.

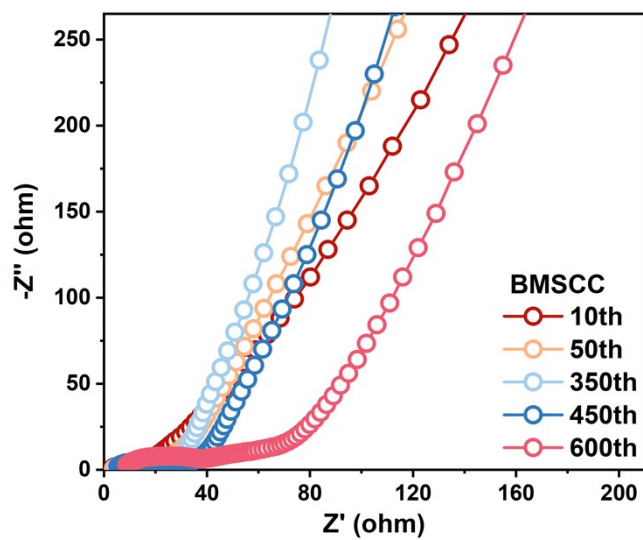

**Figure S10.** Nyquist plots after different cycles of BMSCC.

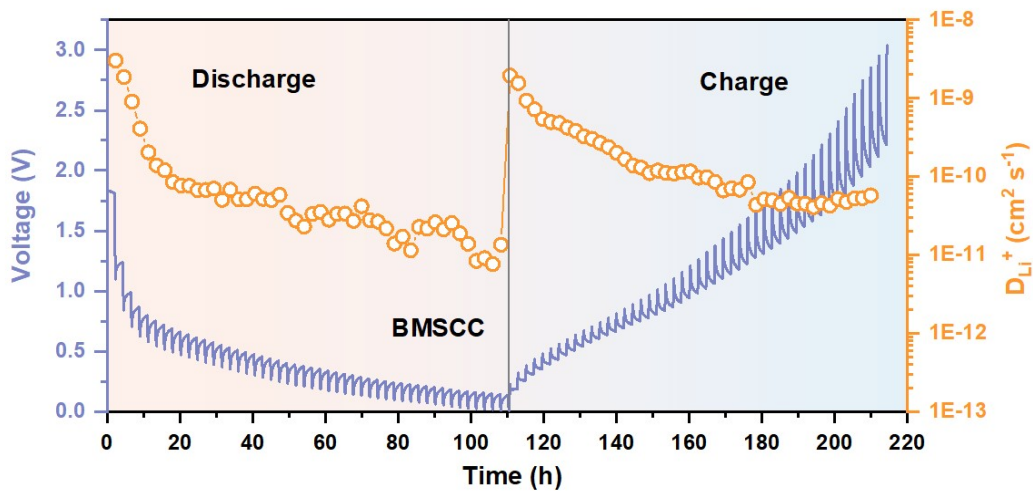

Figure S11. GITT plot of BMSCC.

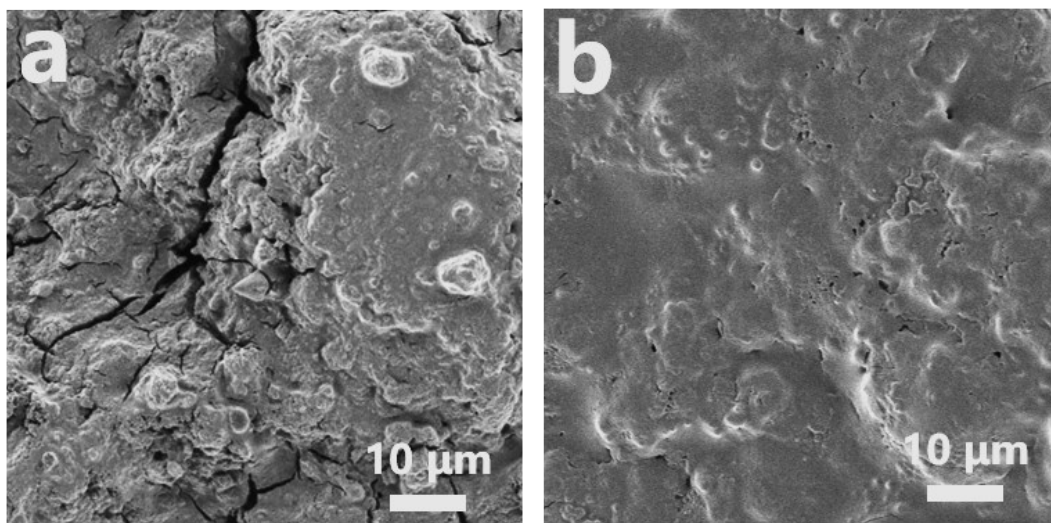

**Figure S12.** The electrodes SEM images of (a) BMSCC and (b) NSBMSCC-2 at 2 A g<sup>-1</sup> after 600 cycles.

**Table S1.** The element mass fraction of NSBMSCC-2.

| Element | Mass Fraction (%) |
|---------|-------------------|
| C       | 30.55             |
| N       | 0.27              |
| O       | 39.71             |
| Si      | 29.24             |
| S       | 0.22              |

**Table S2.** Comprehensive comparison of NSBMSCC-2 with past silicon-based anode materials.

| Sample                                | Ratio of precursor/(precursor+solvant) | ICE  | Current density (A g <sup>-1</sup> ) | Cycle number | Capacity after cycling (mAh g <sup>-1</sup> ) | Capacity retention (%) | Ref       |
|---------------------------------------|----------------------------------------|------|--------------------------------------|--------------|-----------------------------------------------|------------------------|-----------|
| NSBMSCC-2                             | 1                                      | 74.2 | 2.0                                  | 600          | 595                                           | 96.1                   | This work |
| SiO <sub>x</sub> /C@C NTS             | 0.011                                  | 64.6 | 0.5                                  | 450          | 511                                           | 75.7                   | 29        |
| CNT@SiO <sub>x</sub> /C@C             | 0.009                                  | 54.2 | 2                                    | 1000         | 395                                           | 71.1                   | 51        |
| SiO <sub>x</sub> /C-2                 | 0.043                                  | 66.1 | 0.5                                  | 400          | 689                                           | 91                     | 52        |
| SiO <sub>x</sub> @ZrO <sub>2</sub> @C | 0.14                                   | 50   | 0.5                                  | 500          | 413                                           | 72.2                   | 53        |
| SiO <sub>x</sub> /G/C                 | 0.021                                  | 84.3 | 0.12                                 | 350          | 524                                           | 81.3                   | 54        |
| SiO <sub>x</sub> @C@Graphite          | 0.25                                   | 82.6 | 0.2                                  | 100          | 524                                           | 75.7                   | 55        |
| SiO <sub>x</sub> -6/C                 | 0.003                                  | 63.5 | 0.1                                  | 150          | 534                                           | 70.2                   | 56        |
| SiO <sub>x</sub> /C                   | 0.044                                  | 82.2 | 0.325                                | 500          | 580                                           | 90                     | 57        |
| Hp-SiOC@VG                            | 0.068                                  | 74.7 | 1                                    | 600          | 335                                           | 98                     | 58        |
| HSiO <sub>2</sub> @CN                 | 0.015                                  | 50   | 0.2                                  | 600          | 587                                           | 82                     | 59        |
| H-SiO <sub>2</sub> /C                 | 0.015                                  | 69.5 | 2                                    | 400          | 564                                           | 88.3                   | 60        |
